# Supplementary material
Source: MDPI journal article supplement (https://www.mdpi.com/2071-1050/14/11/6601)
Supplement: s1 [file s1]

Archive with 3 entries (3 files):
- Supplementary materials_revised/Supplementary Material 1_Review protocol.pdf
- Supplementary materials_revised/Supplementary Material 2_Quality assessment.pdf
- Supplementary materials_revised/Supplementary Material 3 _Study characteristics_amended.pdf
